# Supplementary material
Source: MDPI journal article supplement (https://www.mdpi.com/2072-4292/14/20/5220)
Supplement: s1 [file s1]

## Analysis of long-term aerosol optical properties combining AERONET sunphotometer and satellite-based observations in Hong Kong

Xinyu Yu <sup>1</sup>, Janet Nichol <sup>2</sup>, Kwon Ho Lee <sup>3</sup>, Jing Li <sup>1</sup>, Man Sing Wong <sup>1,4\*</sup>

<sup>1</sup> Department of Land Surveying and Geo-Informatics, The Hong Kong Polytechnic University, Hong Kong, China

<sup>2</sup> Department of Geography, University of Sussex, Brighton, BN19RH, UK

<sup>3</sup> Department of Atmospheric & Environmental Sciences, Gangneung-Wonju National University, Gangneung, 26403, South Korea

<sup>4</sup> Research Institute for Land and Space, The Hong Kong Polytechnic University, Hong Kong, China

\* Corresponding author. E-mail address: Ls.charles@polyu.edu.hk (M.S. Wong)

### 2.4 Extreme-point symmetric mode decomposition (ESMD)

ESMD was developed based on ensemble empirical mode decomposition (EEMD, Wang & Li, 2013), which can be used to detect the time-dependent non-linear tendency without antecedent assumption. After using ESMD, original signals can be decomposed into several intrinsic mode functions (IMFs) and a residual curve (R). The specific decomposition process of ESMD is as follows:

- (1) Input time series  $Y(m)$ , set the maximum number of filters  $K$  and the number of remaining poles  $l$ , and find all of the local extreme points (maximum points and minimum points). Label them as  $E_m$  ( $1 \leq m \leq n$ ),  $E_m = (z_m, x_m)$ .
- (2) Connect the adjacent poles  $E_m$  with lines, and record the midpoints of the lines as  $F_m$  ( $1 \leq m \leq n - 1$ ), then add boundary midpoints  $F_0$  and  $F_n$ .
- (3) Construct  $p$  interpolation curves  $L_1, \dots, L_p$  ( $p > 1$ ) with  $n + 1$  midpoints, and calculate the mean value by  $L^* = (L_1 + \dots + L_p)/p$ .
- (4) Repeat the above steps for  $Y(m) - L^*$  until  $|L^*| \leq \varepsilon$  ( $\varepsilon$  is the allowable error) or the filters times get the preset maximum  $K$ , then we get the first IMF component  $M_1$ .
- (5) Repeat the above 4 steps for the remaining sequence  $Y(m) - M_1$  until the remaining trend residual  $R(m)$  is a single signal or is no longer larger than a given extreme point, then we can obtain the IMF component  $M_2, M_3, \dots, M_n$ , separately.
- (6) Change the value of  $K$  within the limited interval  $[K_{min}, K_{max}]$  and calculate the variance ratio  $G$ , record the sequence as  $Y(m) = \{y_m\}_{m=1}^N$ , the trend residual as  $R(m) = \{r_m\}_{m=1}^N$ .  $\sigma$  and  $\sigma_0$  are the relative standard deviation of  $Y(m) - R(m)$  and the standard deviation of  $Y(m)$ , respectively. When  $G = \sigma/\sigma_0$  gets the minimum value, it means that the sequence

with the trend residual  $R(m)$  removed is the closest to the original sequence  $Y(m)$ , that is, the decomposition effect is the best.

- (7) Plot the graph of the variance ratio with  $K$ , and select the maximum number of filters times  $K_0$  according to the minimum variance ratio. Repeat (1) ~ (6) to obtain the optimal decomposition result (IMF1, IMF2, ..., IMF $n$  and R).

### 3. Results and discussion

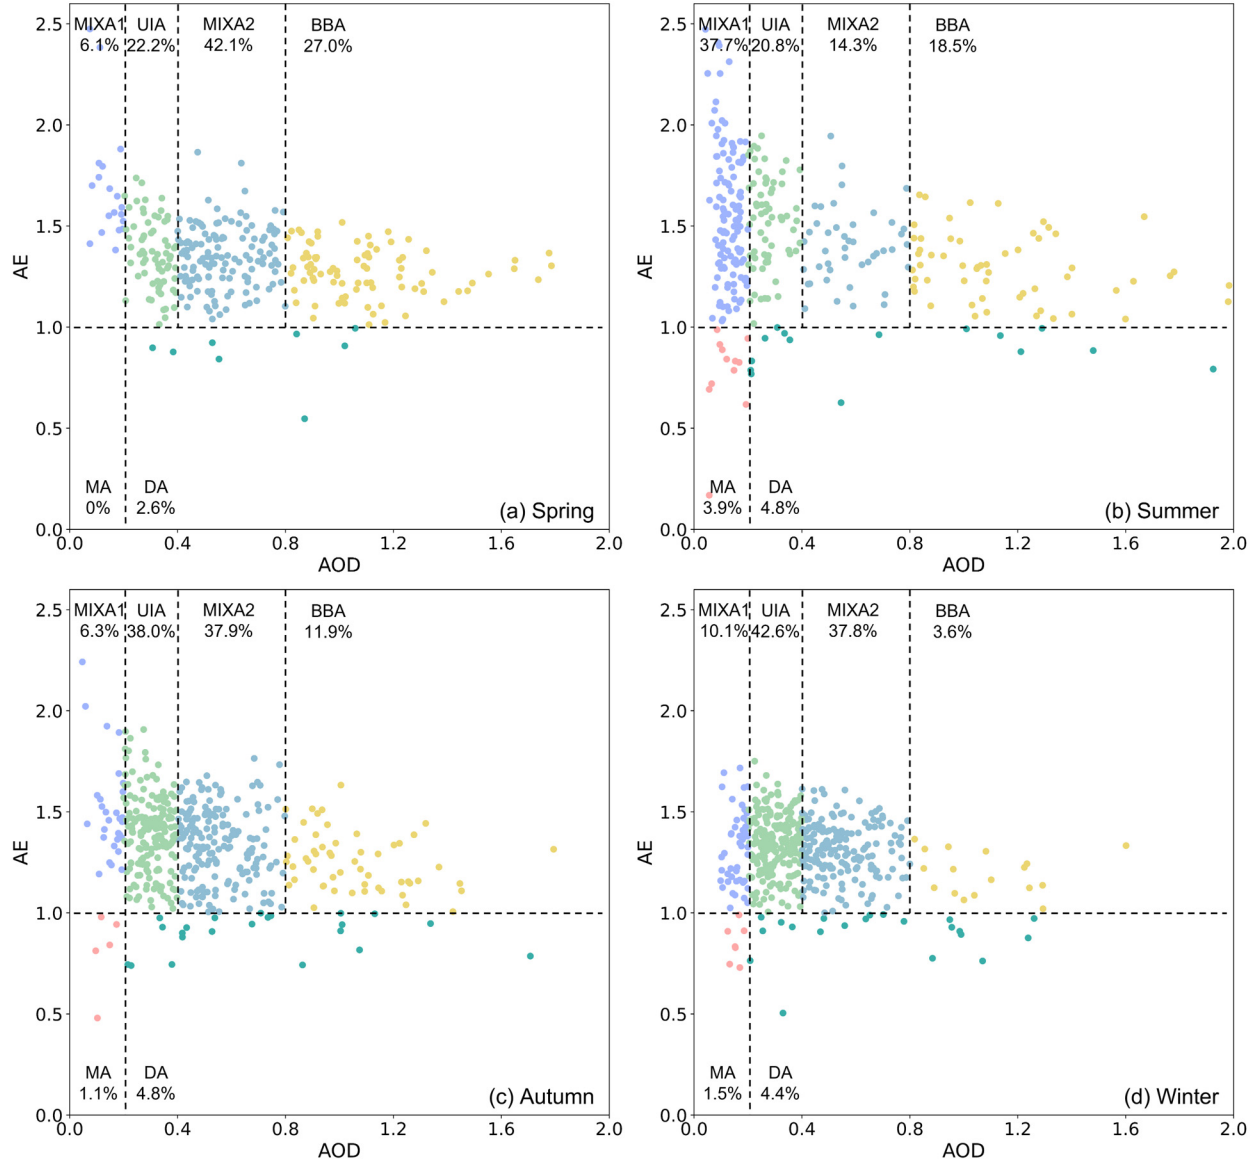

**Figure S1.** Seasonal aerosol types based on daily measurements of the PolyU AERONET station. (a) spring; (b) summer; (c) autumn and (d) winter.

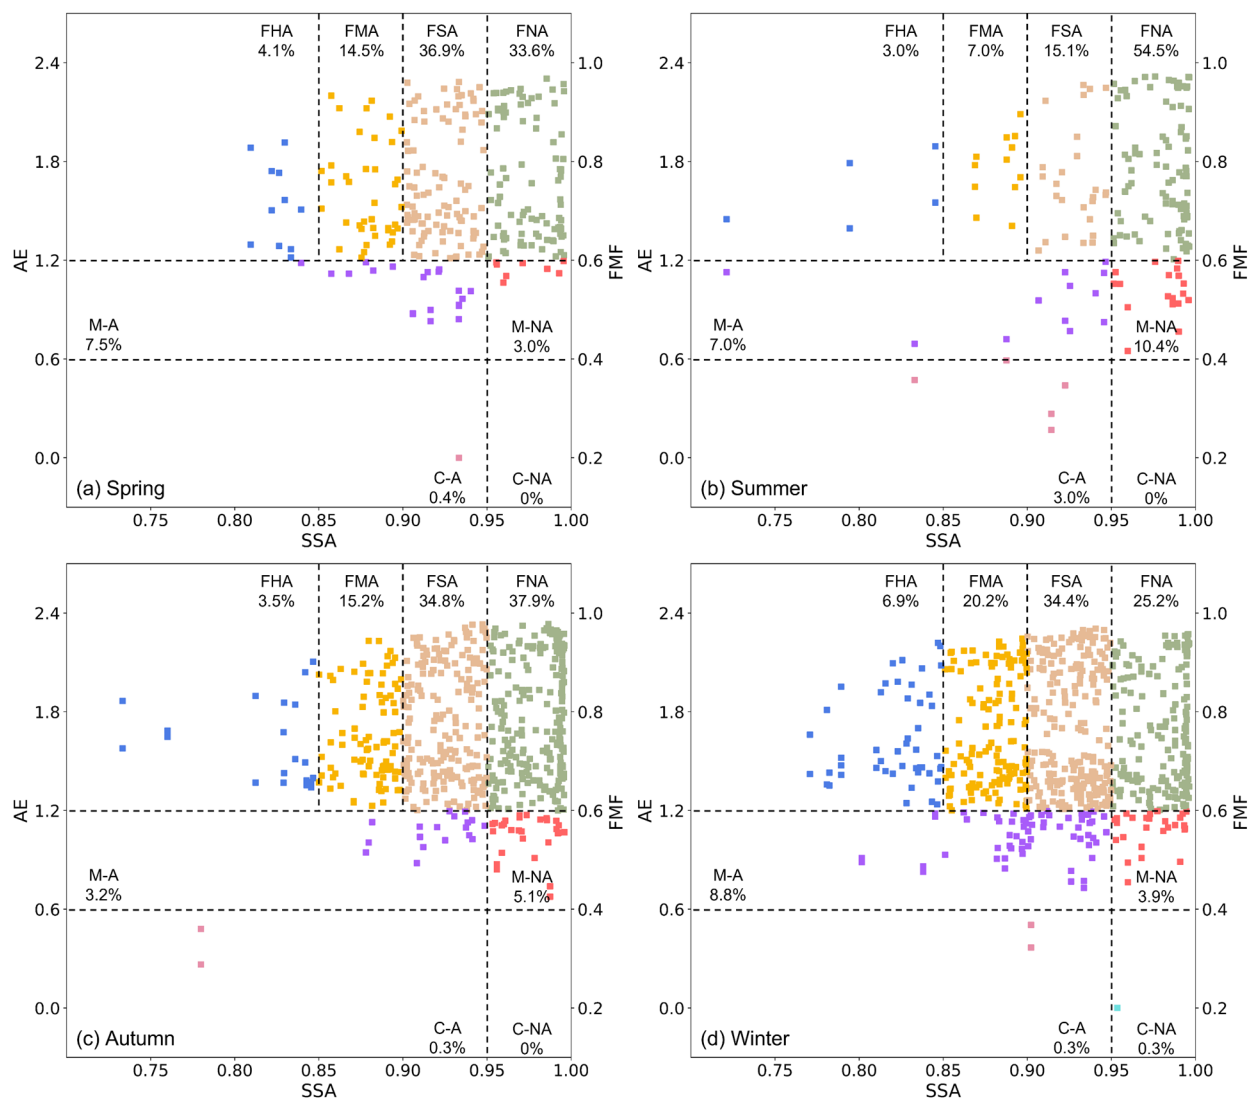

**Figure S2.** Seasonal absorbing aerosol types based on daily measurements of the PolyU AERONET station. (a) spring; (b) summer; (c) autumn and (d) winter.

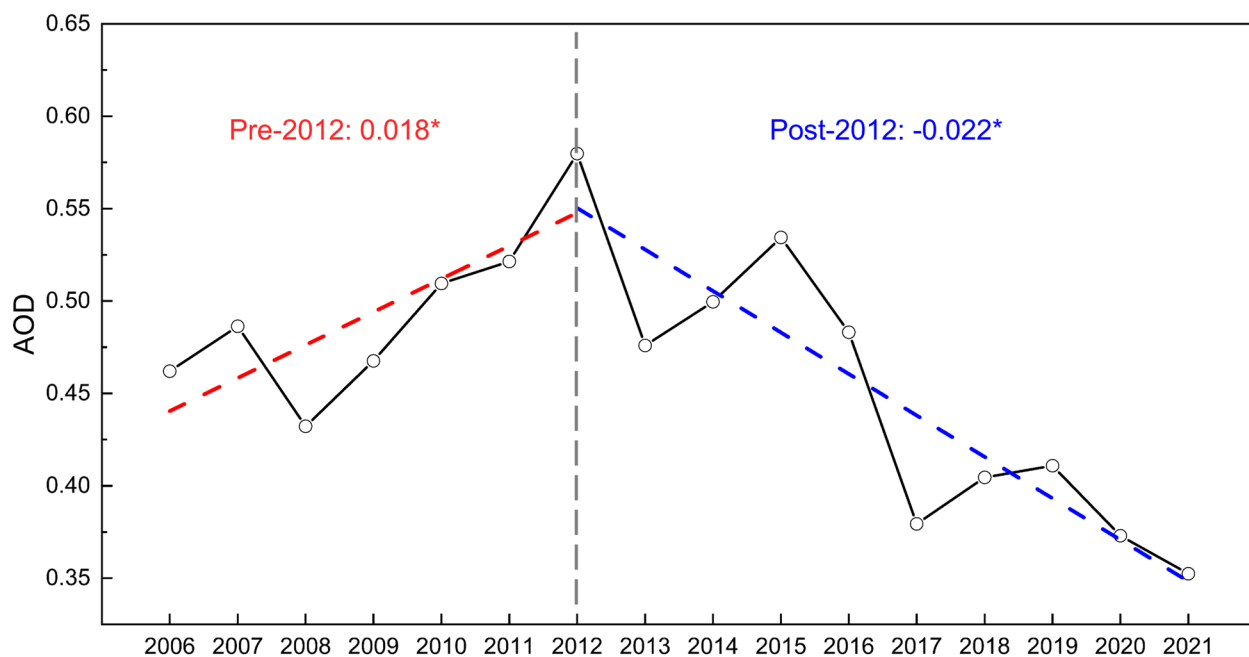

**Figure S3.** Variations of annual mean AOD with the linear trend ( $\text{yr}^{-1}$ ) in two different periods, namely pre-2012 (red) and post-2012 (blue). \* represents the trends passing the 95% confidence level.

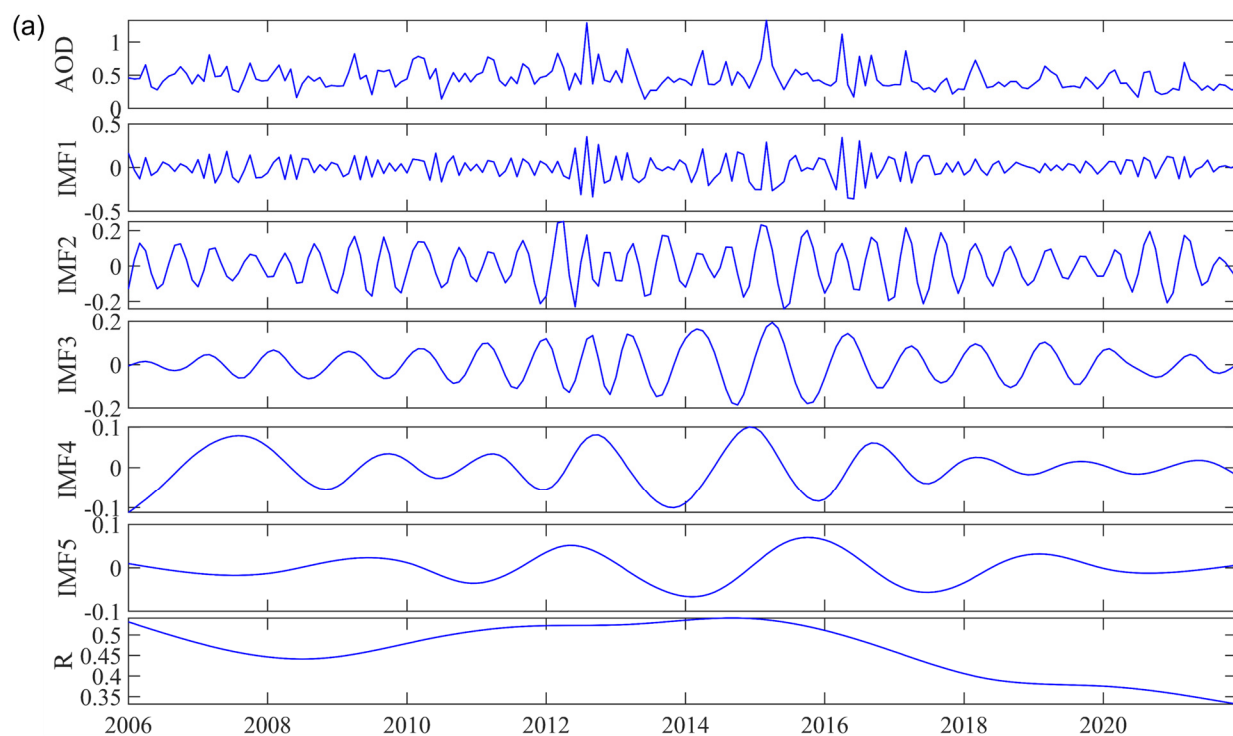

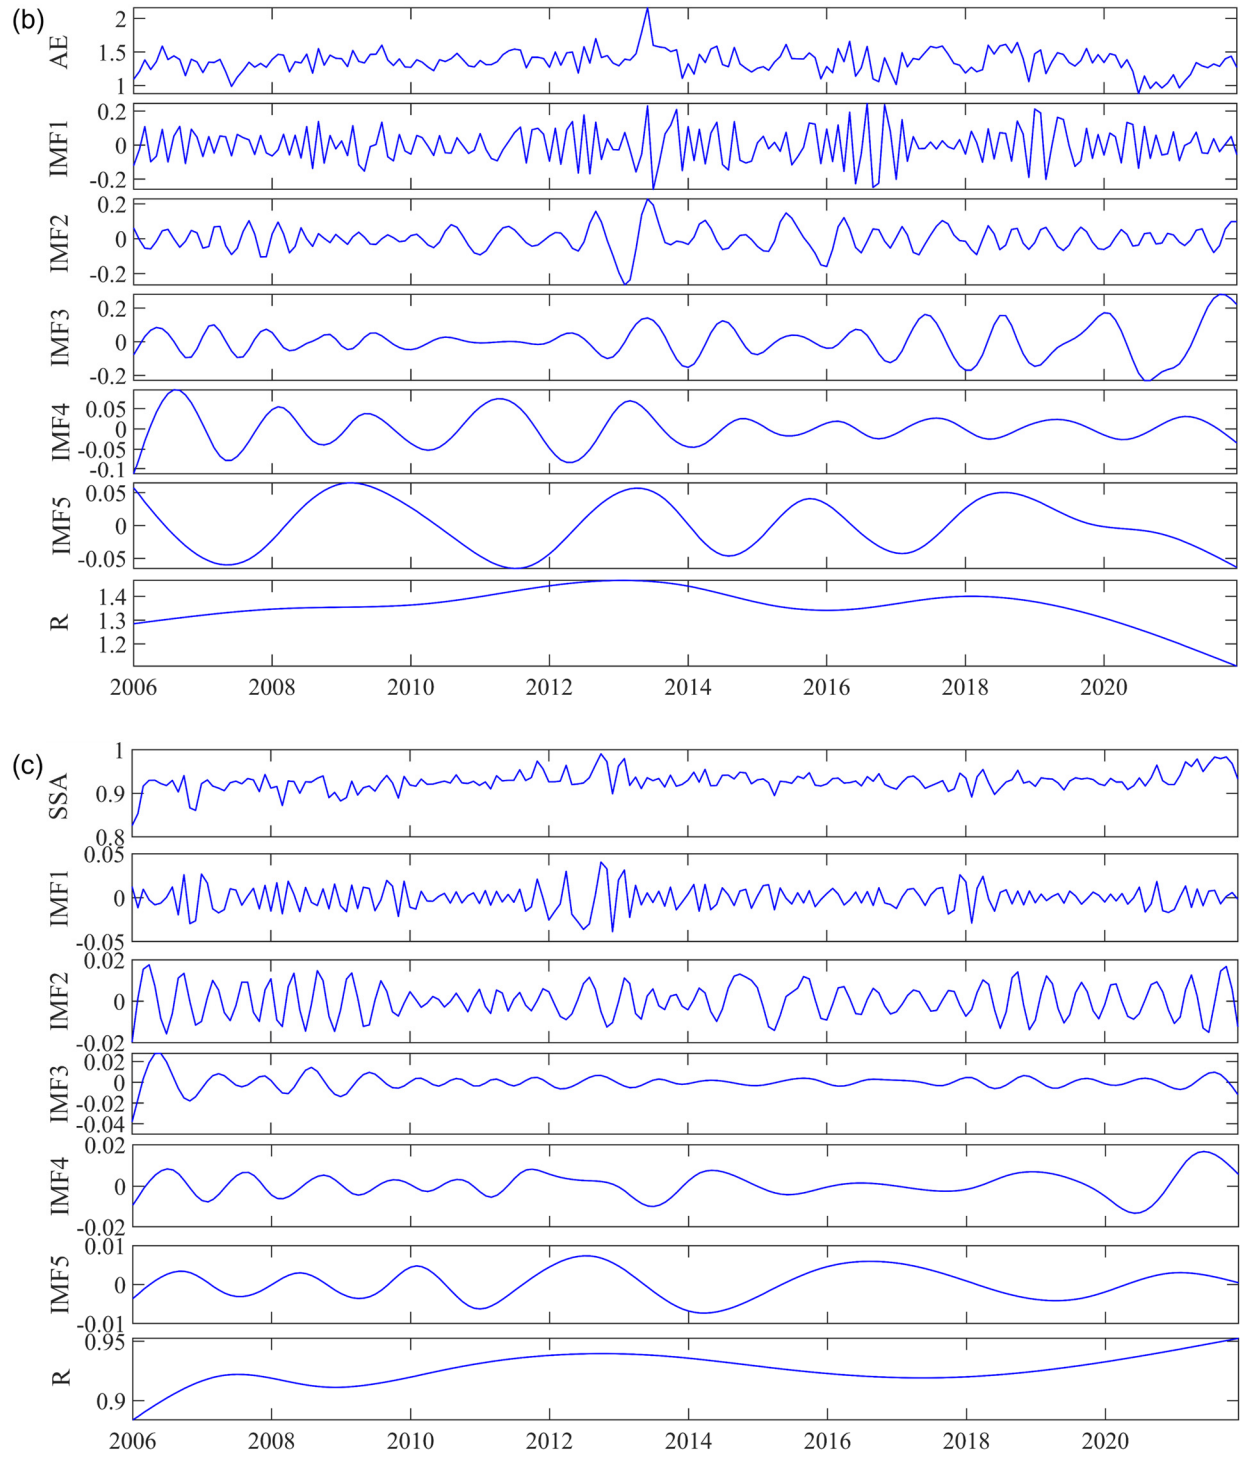

**Figure S4.** The decomposed results of aerosol optical parameters based on ESMD. (a) AOD, (b) AE and (c) SSA.

**Table S1.** Variance contribution rate (VCR, %) and correlation coefficient (CC) of the IMFs.

|     |     | Spring |       | Summer |       |      | Autumn |       | Winter |       |       |
|-----|-----|--------|-------|--------|-------|------|--------|-------|--------|-------|-------|
|     |     | IMF1   | IMF2  | IMF1   | IMF2  | IMF3 | IMF1   | IMF2  | IMF1   | IMF2  | IMF3  |
| AOD | VCR | 82.31  | 4.66  | 59.47  | 27.27 | 7.41 | 47.03  | 17.51 | 54.36  | 16.04 | -     |
|     | CC  | 0.86*  | 0.09  | 0.76*  | 0.42* | 0.19 | 0.51*  | 0.38* | 0.60*  | 0.36* | -     |
| AE  | VCR | 50.66  | 18.25 | 29.05  | 34.06 | -    | 35.35  | 39.64 | 46.62  | 38.61 | -     |
|     | CC  | 0.67*  | 0.34* | 0.51*  | 0.47* | -    | 0.57*  | 0.58* | 0.69*  | 0.62* | -     |
| SSA | VCR | 39.11  | 23.02 | 37.92  | 11.10 | -    | 54.03  | 17.59 | 22.76  | 14.58 | 14.06 |
|     | CC  | 0.17   | 0.41* | 0.69*  | 0.38* | -    | 0.75*  | 0.44* | 0.52*  | 0.33* | 0.38* |

\* represents the significance test at the 95% confidence level

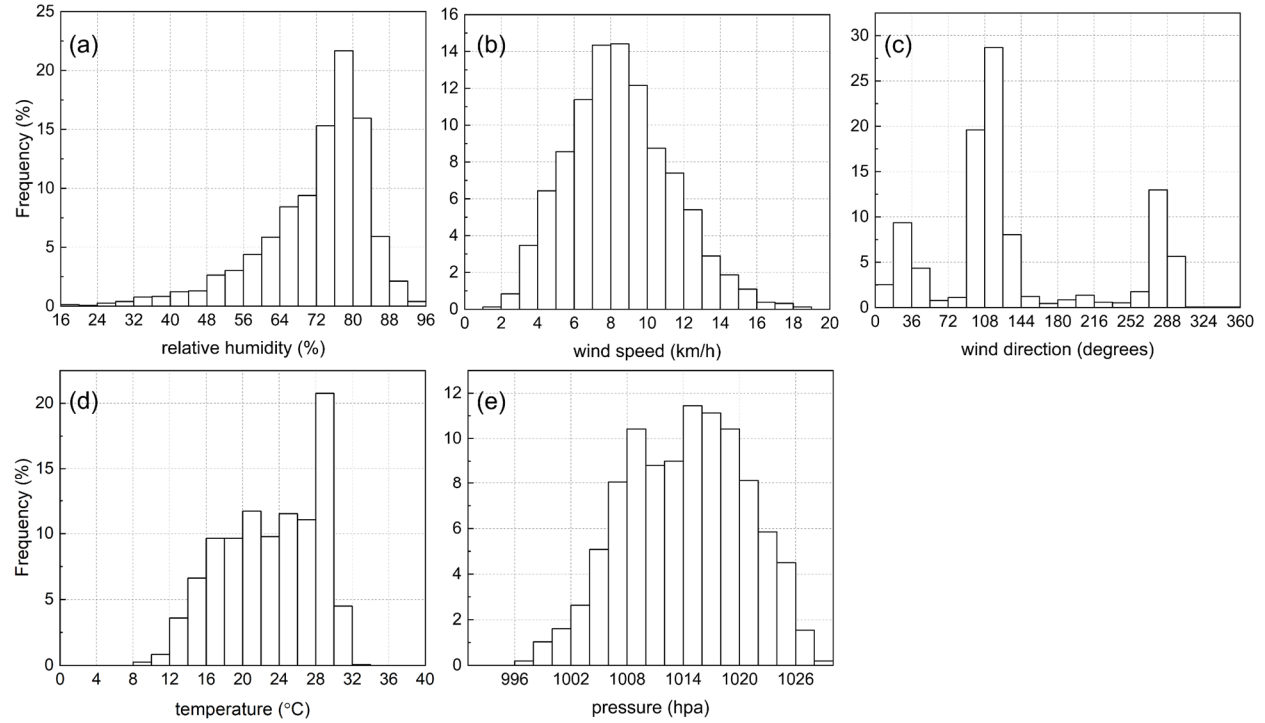

**Figure S5.** Distribution frequency of meteorological factors.

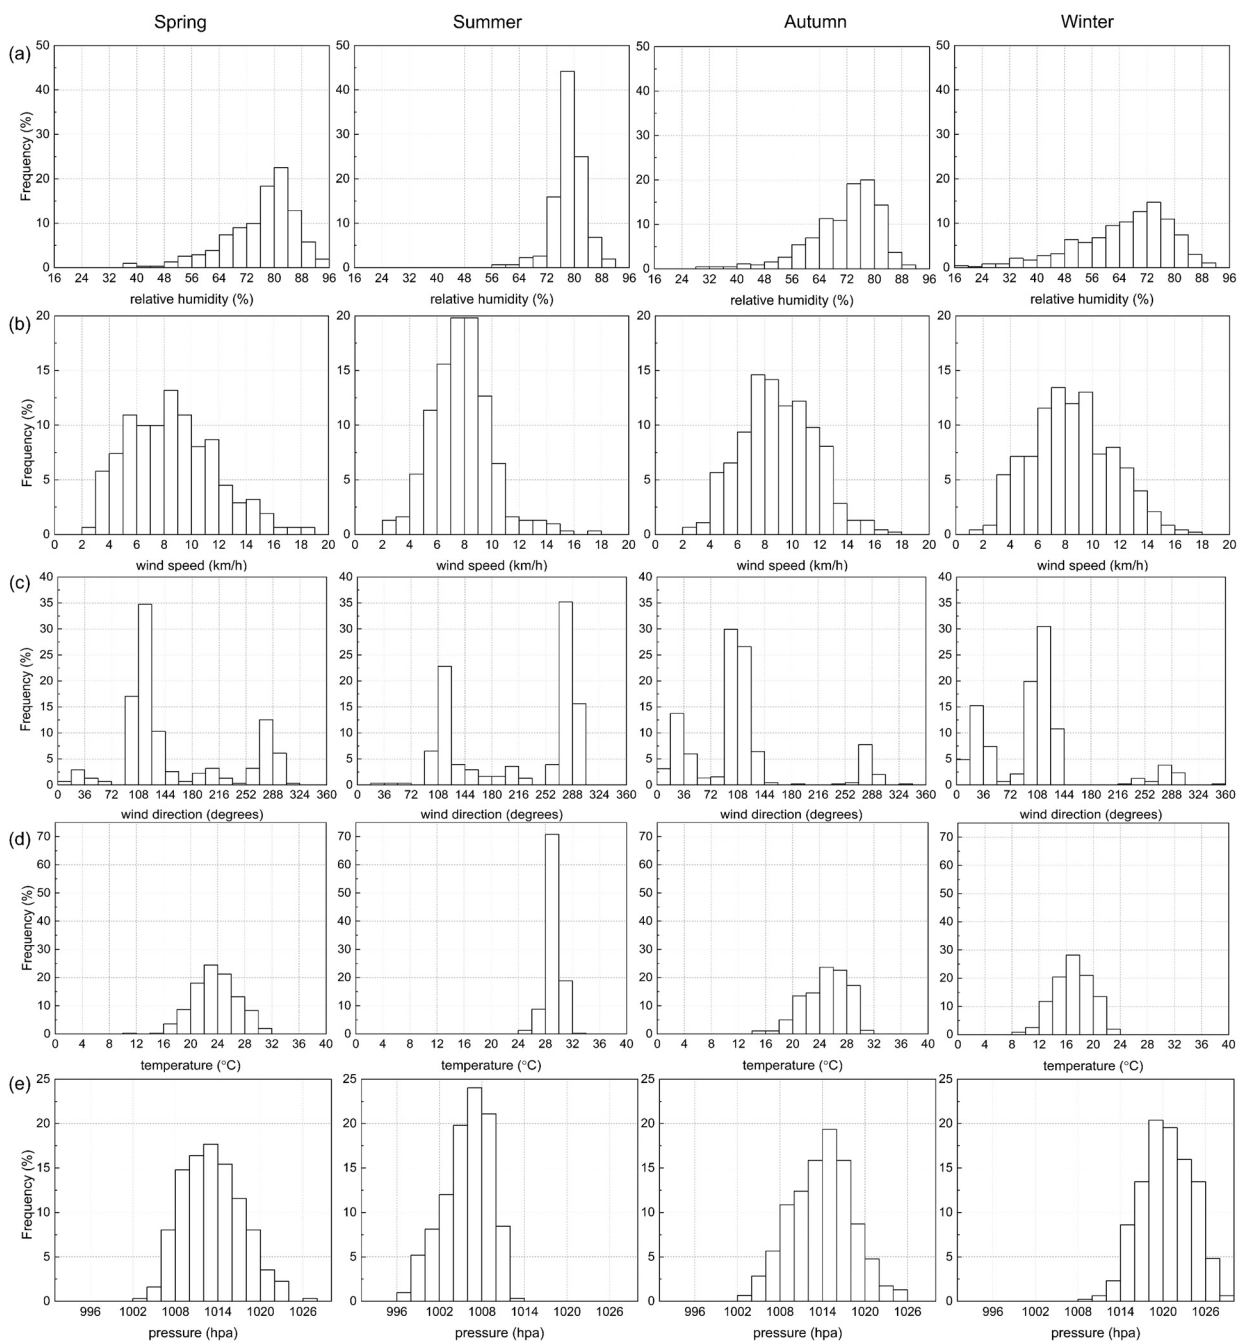

**Figure S6.** Distribution frequency of multi-seasonal meteorological factors.
